# Supplementary material for: How to Write Statistical Analysis Section in Medical Research
Source: HighWire-hosted journal article supplement (doi:10.1136/jim-2022-002479), 2022-06-16
Supplement: jim-2022-002479supp001_data_supplement.pdf [file jim-2022-002479supp001_data_supplement.pdf]

Table S1. Articles used for identifying statistical issues in the statistical analysis section

| PMID     | Title                                                                                                                                                          |
|----------|----------------------------------------------------------------------------------------------------------------------------------------------------------------|
| 25848638 | Important statistical points to improve and promote the methodology of the articles on medical sciences, particularly nephrology and kidney; a review article. |
| 19260441 | Statistical pitfalls in medical research.                                                                                                                      |
| 17299669 | Statistical errors in medical research - a review of common pitfalls.                                                                                          |
| 22125459 | Misuse of statistical methods in 10 leading Chinese medical journals in 1998 and 2008.                                                                         |
| 19435635 | Common statistical and research design problems in manuscripts submitted to high-impact psychiatry journals: what editors and reviewers want authors to know.  |
| 11929408 | Statistical issues--significantly important in medical research.                                                                                               |
| 29209453 | Statistical methods and common problems in medical or biomedical science research                                                                              |
| 26256144 | Statistical Considerations for Readers and Authors of the Forensic Science Literature.                                                                         |
| 33344343 | Pitfalls in Article Submissions for Publication.                                                                                                               |
| 21854631 | Common statistical and research design problems in manuscripts submitted to high-impact medical journals                                                       |
| 33948238 | Learning gaps among statistical competencies for clinical and translational science learners.                                                                  |
| 30881471 | The Principles of Biomedical Scientific Writing: Materials and Methods.                                                                                        |

PMID: PubMed ID; Search terms used: Statistical “problems or issues or pitfalls or errors or misuse” in medical research.

Table S2. Biostatistics applications at different phases of research design

| Research steps                       | Goal                                                                         | Biostatistics Applications                                                                                                                                                                      |
|--------------------------------------|------------------------------------------------------------------------------|-------------------------------------------------------------------------------------------------------------------------------------------------------------------------------------------------|
| Research question                    | Refining questions by converting good questions to great questions           | Exposure, primary and secondary outcomes and their forms in view of hypothesis, multiplicity, multiple comparisons, and study objectives                                                        |
| Study design                         | Optimum design                                                               | Eliminating biases by setting design features at the beginning and during the study execution                                                                                                   |
| Data generation process              | Selection of subjects and measurement process to address hypothesis/question | Assist in probabilistic/non-probabilistic procedures for selecting subjects, the optimum number of measurements in different conditions, outcome distribution consideration, and other factors. |
| Sample size & power analyses         | Optimum study size                                                           | Sample size simulations and computation                                                                                                                                                         |
| Factors and collection               | Avoiding bad data                                                            | List of measurements on the conceptual framework, their forms and roles for statistical models                                                                                                  |
| Data management and analytic dataset | Obtain reusable datasets with data transparency                              | Minimizing data errors by data checks, coding, proper labeling and preparing the analytic dataset                                                                                               |

|                   |                                        |                                                                                                                                                                                                                                                  |
|-------------------|----------------------------------------|--------------------------------------------------------------------------------------------------------------------------------------------------------------------------------------------------------------------------------------------------|
| Data analysis     | Obtain meaningful findings             | Conduct and report necessary steps for measuring accuracy, efficiency, reliability, consistency, and applicability                                                                                                                               |
| Interpreting data | Obtain meaningful conclusions          | Avoiding incorrect or over-interpretation not aligned with effect size, confidence interval, p-value, study design, protocol deviation, and consistencies and inconsistencies between findings from primary, secondary, and sensitivity analyses |
| Presenting data   | Transparent message and interpretation | Assist in providing transparent reporting, usability, and meaningful interpretation of data                                                                                                                                                      |

Table S3. The evidence-based preferred methods in different conditions/settings

| Condition                                 | EBB preferred method                      | Standard or common practice                        |
|-------------------------------------------|-------------------------------------------|----------------------------------------------------|
| Unpaired data                             | Welch t-test or bootstrap t-test          | Unpaired t-test                                    |
| Discrete or ordinal data                  | Bootstrap t-test or nonparametric test    | Parametric test                                    |
| Pre-post changes between groups           | ANCOVA                                    | Unpaired or paired t-tests or percent change       |
| Propensity matched                        | Paired analysis                           | Unpaired analysis                                  |
| Binary data in a cohort or clinical trial | Relative risk models                      | Odds ratio models                                  |
| Binary data in a case-control study       | Odds ratio models                         | Odds ratio models                                  |
| Binary data in a cross-sectional study    | Relative risk models                      | Odds ratio models                                  |
| Clustered interventional data             | Robust GEE                                | GLM                                                |
| Longitudinal data                         | GEE/GLMM                                  | GLM                                                |
| Time to event data                        | Cox/PM survival models                    | Logistic regression                                |
| Diagnostic study data                     | Robust multinomial logistic /GEE          | Unadjusted analysis                                |
| Non-linearity assessment                  | Multivariable polynomial                  | Transformation                                     |
| Interventional study                      | Alternative of p-values                   | Nominal p-value                                    |
| Nonrandomized interventional study        | Propensity score-adjusted                 | Simple adjusted analysis                           |
| Exploratory objective study               | Backward variable selection               | Stepwise                                           |
| Association objective study               | Full adjustment of all relevant variables | Univariate selection with $p < 0.05$               |
| Prediction objective study                | Random forest/bootstrap/backward          | Univariate selection with $p < 0.05$               |
| Highly skewed outcome data                | Generalized nonlinear model               | Linear regression on transformed data              |
| Count data                                | Count models/inflated count model         | Logistic regression after ignoring count structure |

EBB: evidence-based biostatistics; ANCOVA: analysis of covariance; GEE; generalized estimating equations; GLMM: generalized linear mixed model; PM: parametric; GLM: generalized linear model.
